# Supplementary material for: Triterpenoids with α-glucosidase inhibitory activity and cytotoxic activity from the leaves ofAkebia trifoliata
Source: Royal Society of Chemistry journal article supplement (doi:10.1039/c8ra08894b), 2018-01-01

## Supporting Information

In this ‘Supporting Information’ file for the manuscript entitled “**Triterpenoids with  $\alpha$ -Glucosidase Inhibitory Activity and Cytotoxic Activity from the Leaves of *Akebia trifoliata***”, 1D and 2D NMR spectra of new compounds **1** and **2** are available here as listed below.

### Contents:

Page 2–7:  $^1\text{H}$  and  $^{13}\text{C}$  NMR, HSQC,  $^1\text{H}$ - $^1\text{H}$  COSY, HMBC and NOESY spectra of **1**.

Page 8–12:  $^1\text{H}$  and  $^{13}\text{C}$  NMR, HSQC, HMBC and NOESY spectra of **2**.

$^1\text{H}$  NMR spectrum of compound **1**

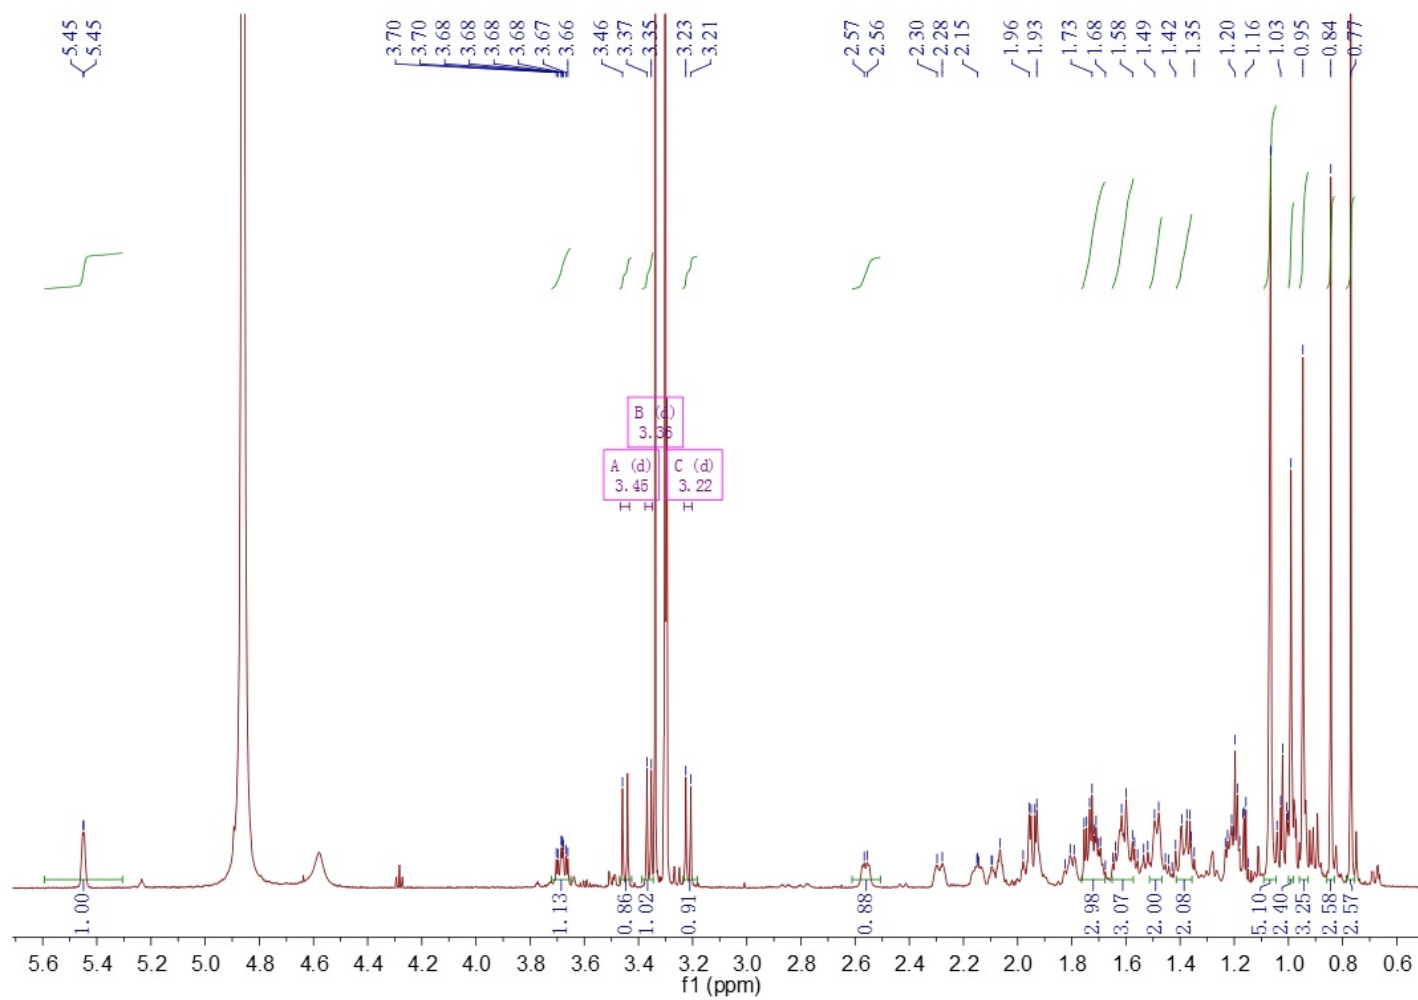

$^{13}\text{C}$  NMR spectrum of compound **1**

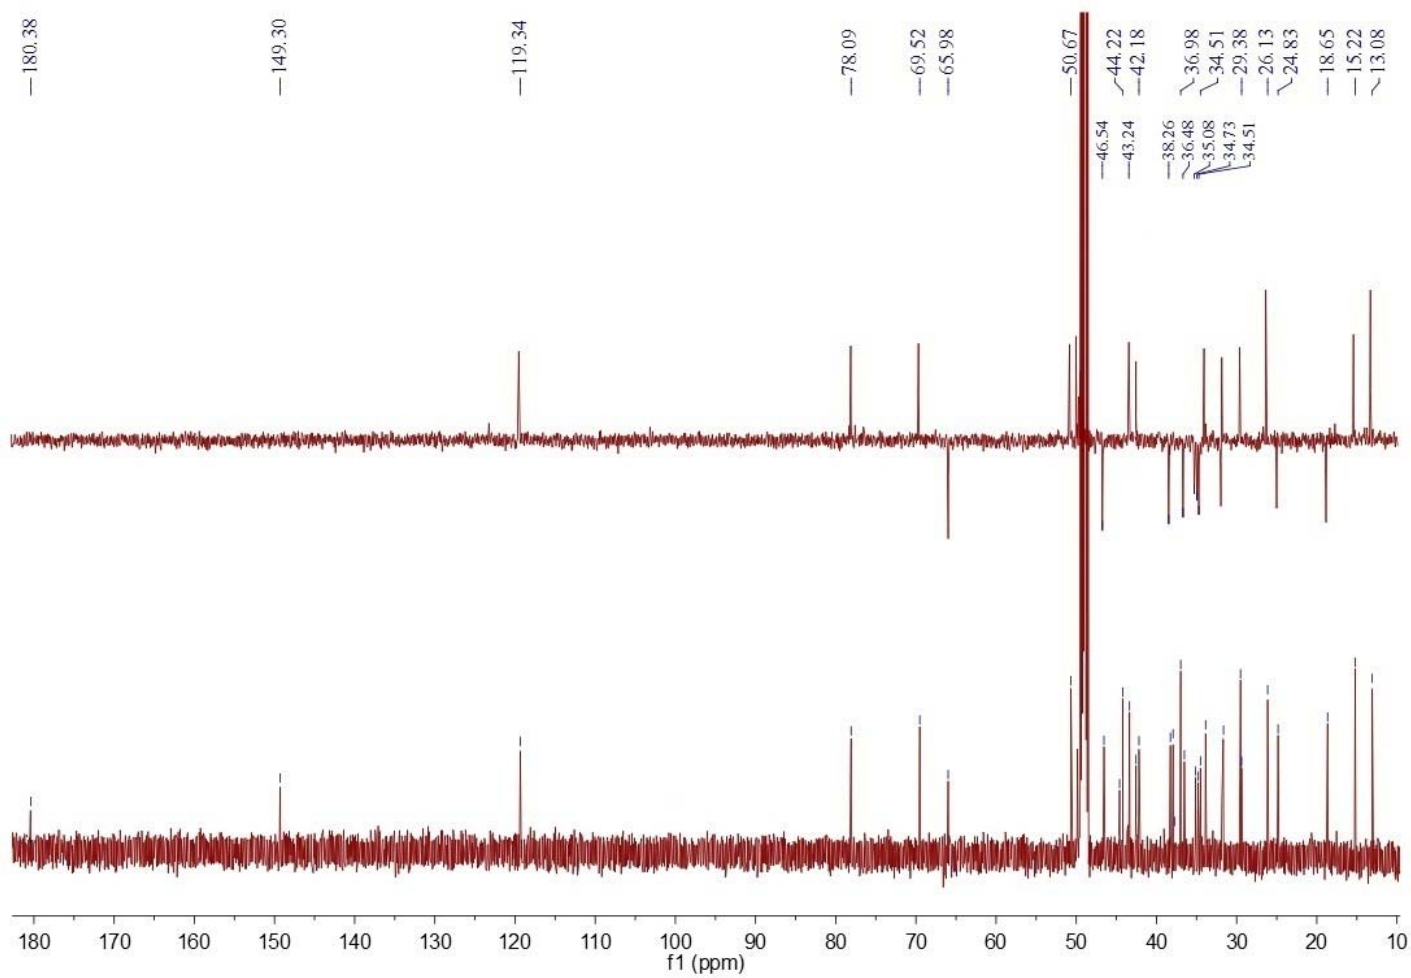

HSQC spectrum of compound 1

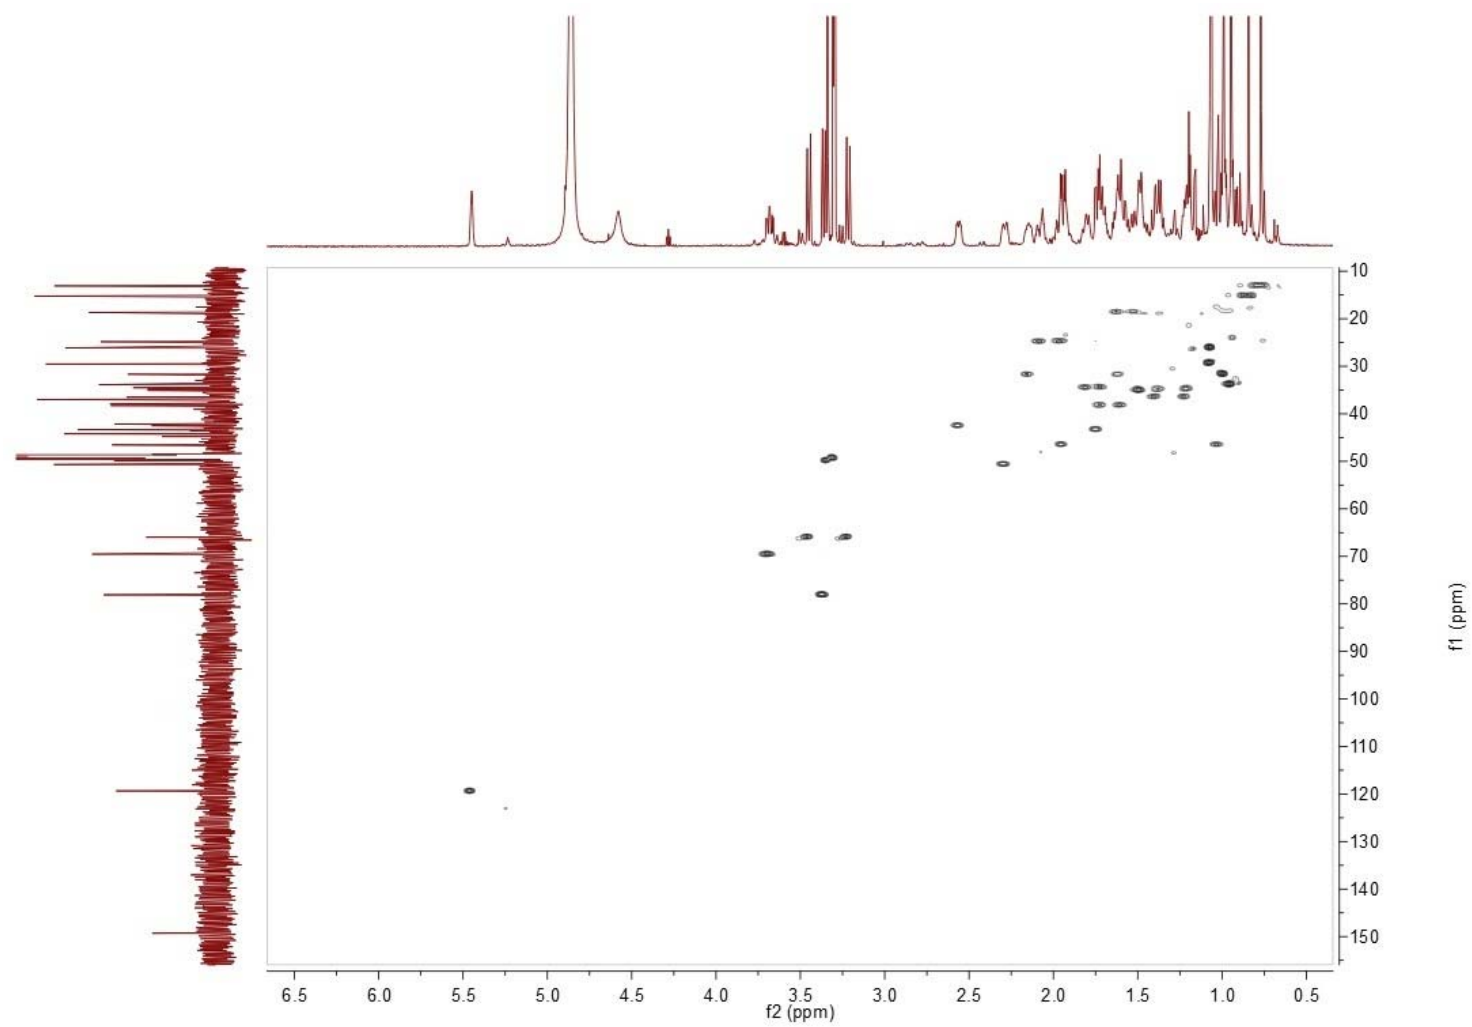

$^1\text{H}$ - $^1\text{H}$  COSY spectrum of compound **1**

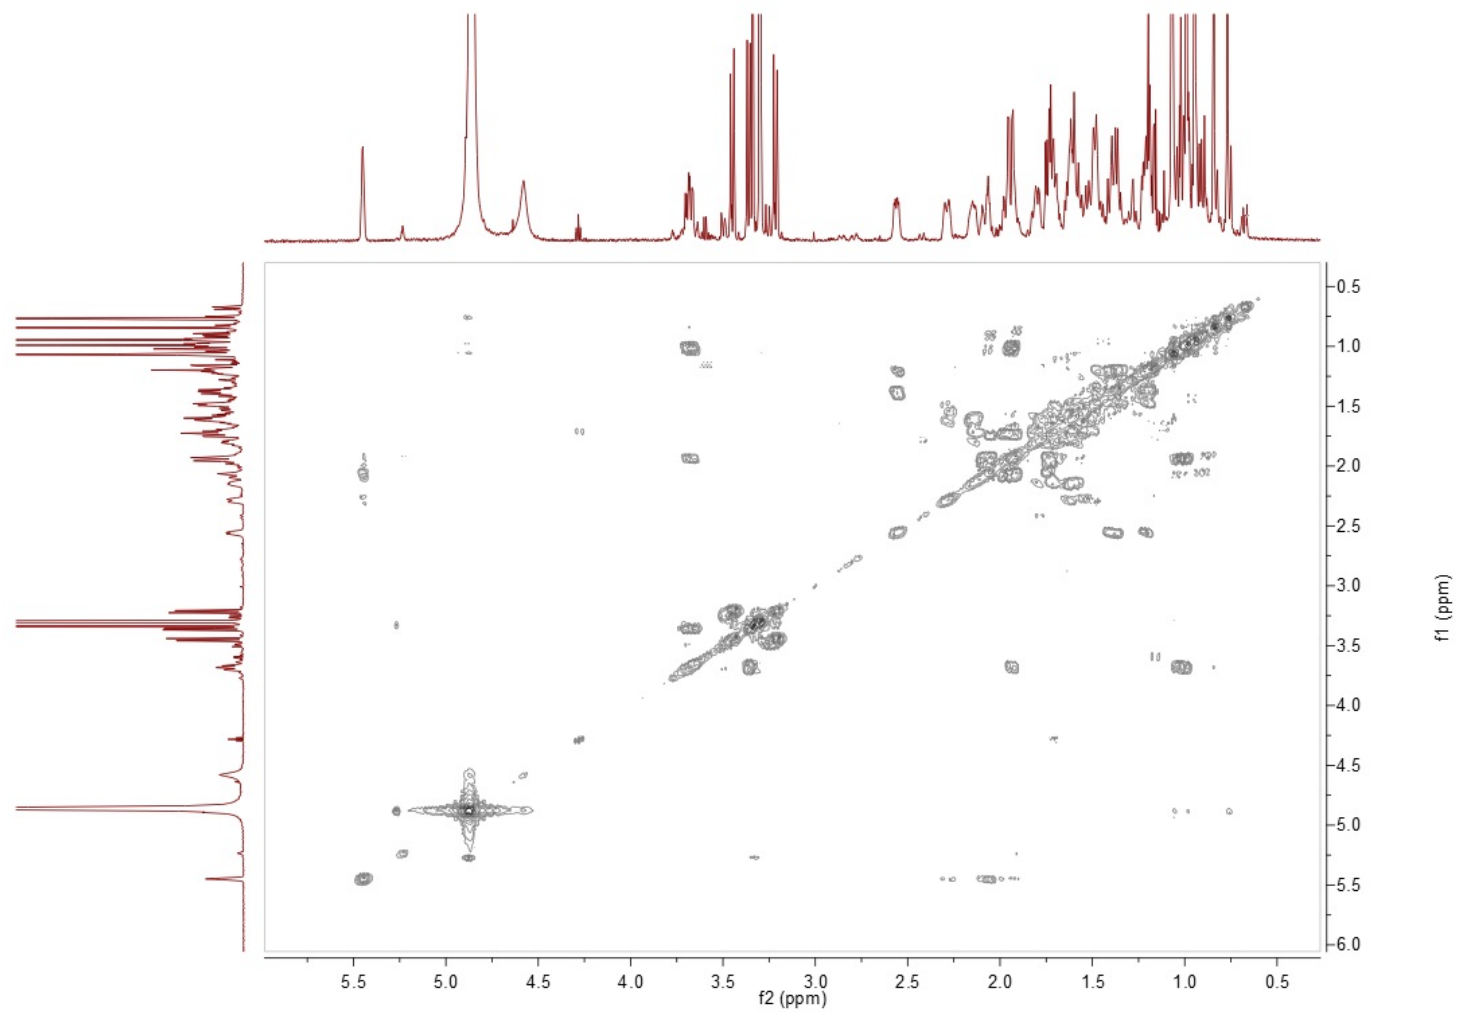

HMBC spectrum of compound **1**

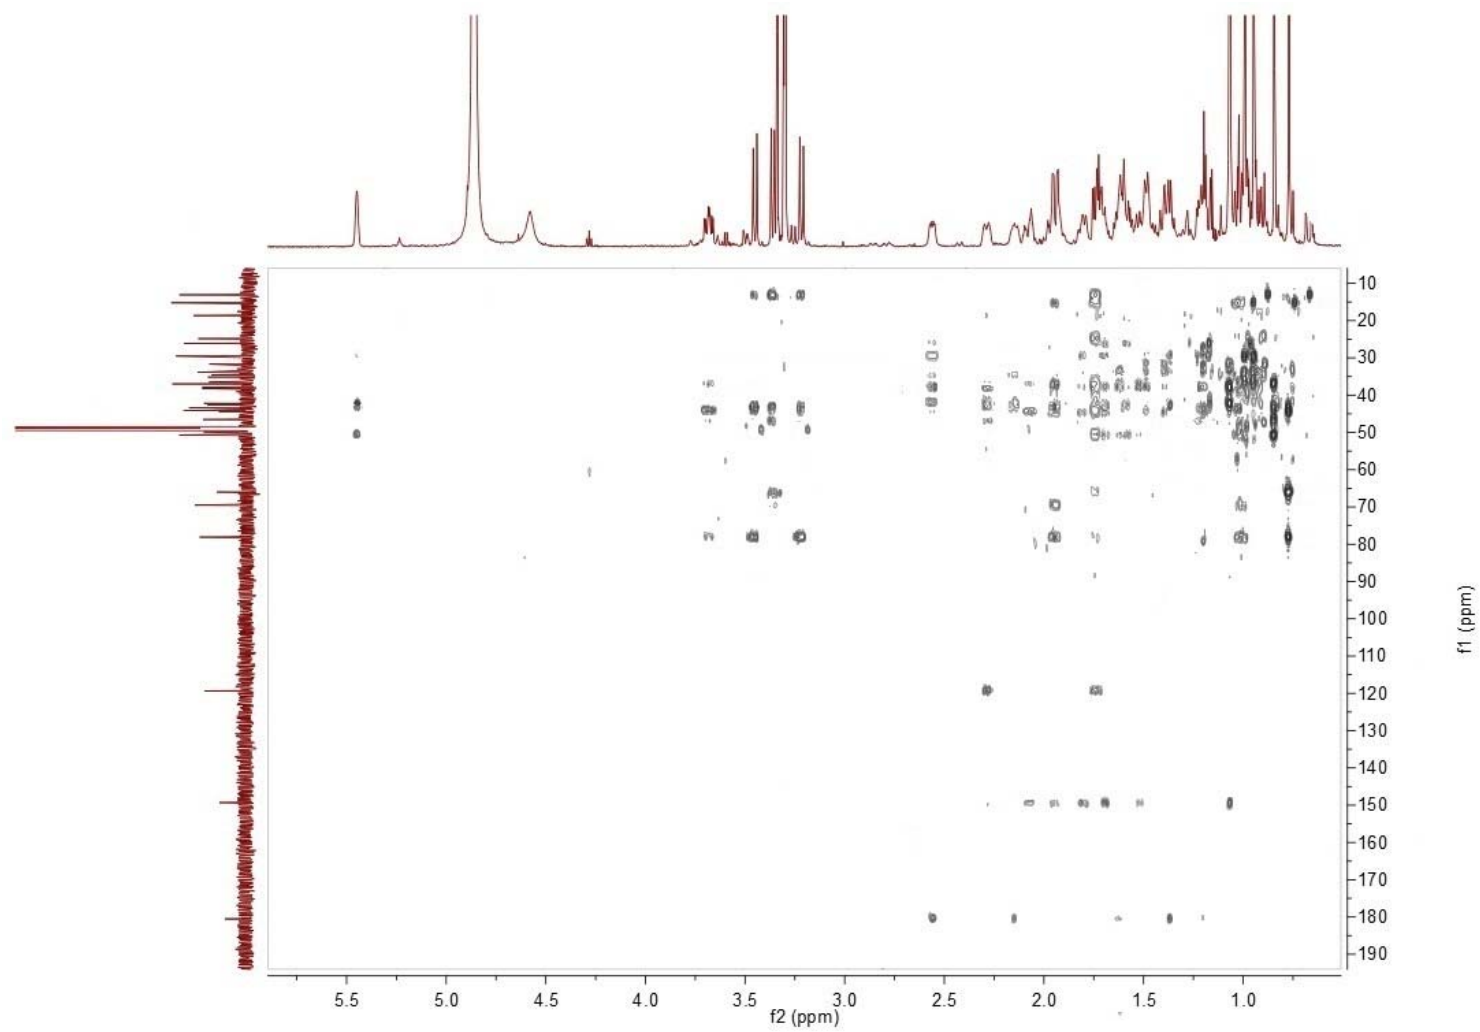

NOESY spectrum of compound **1**

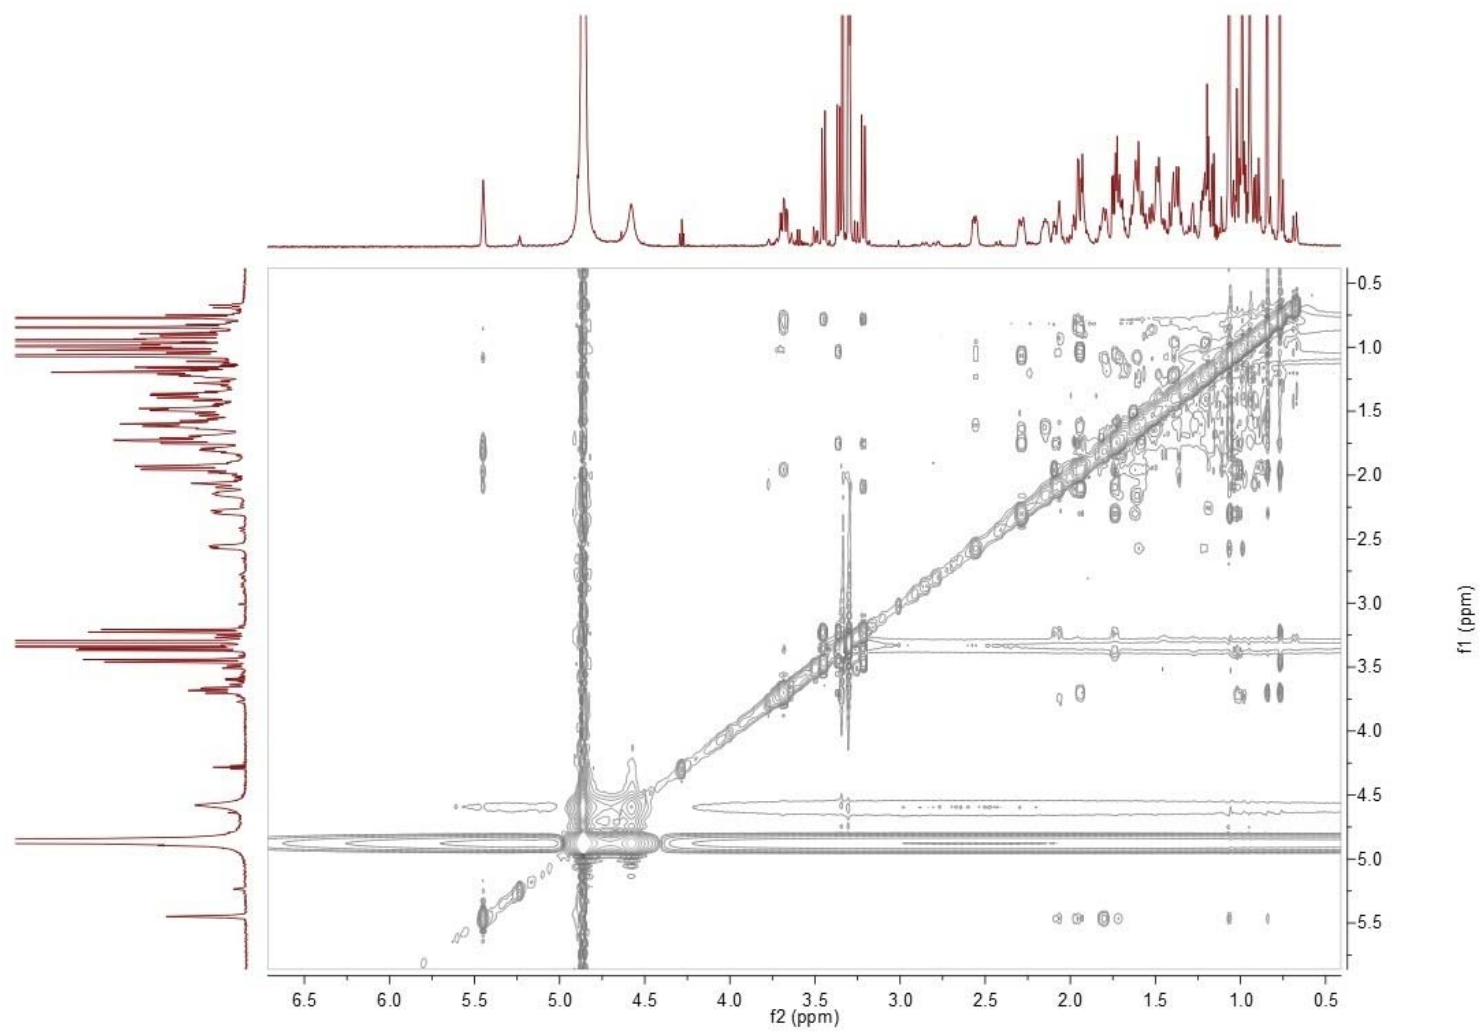

$^1\text{H}$  NMR spectrum of compound **2**

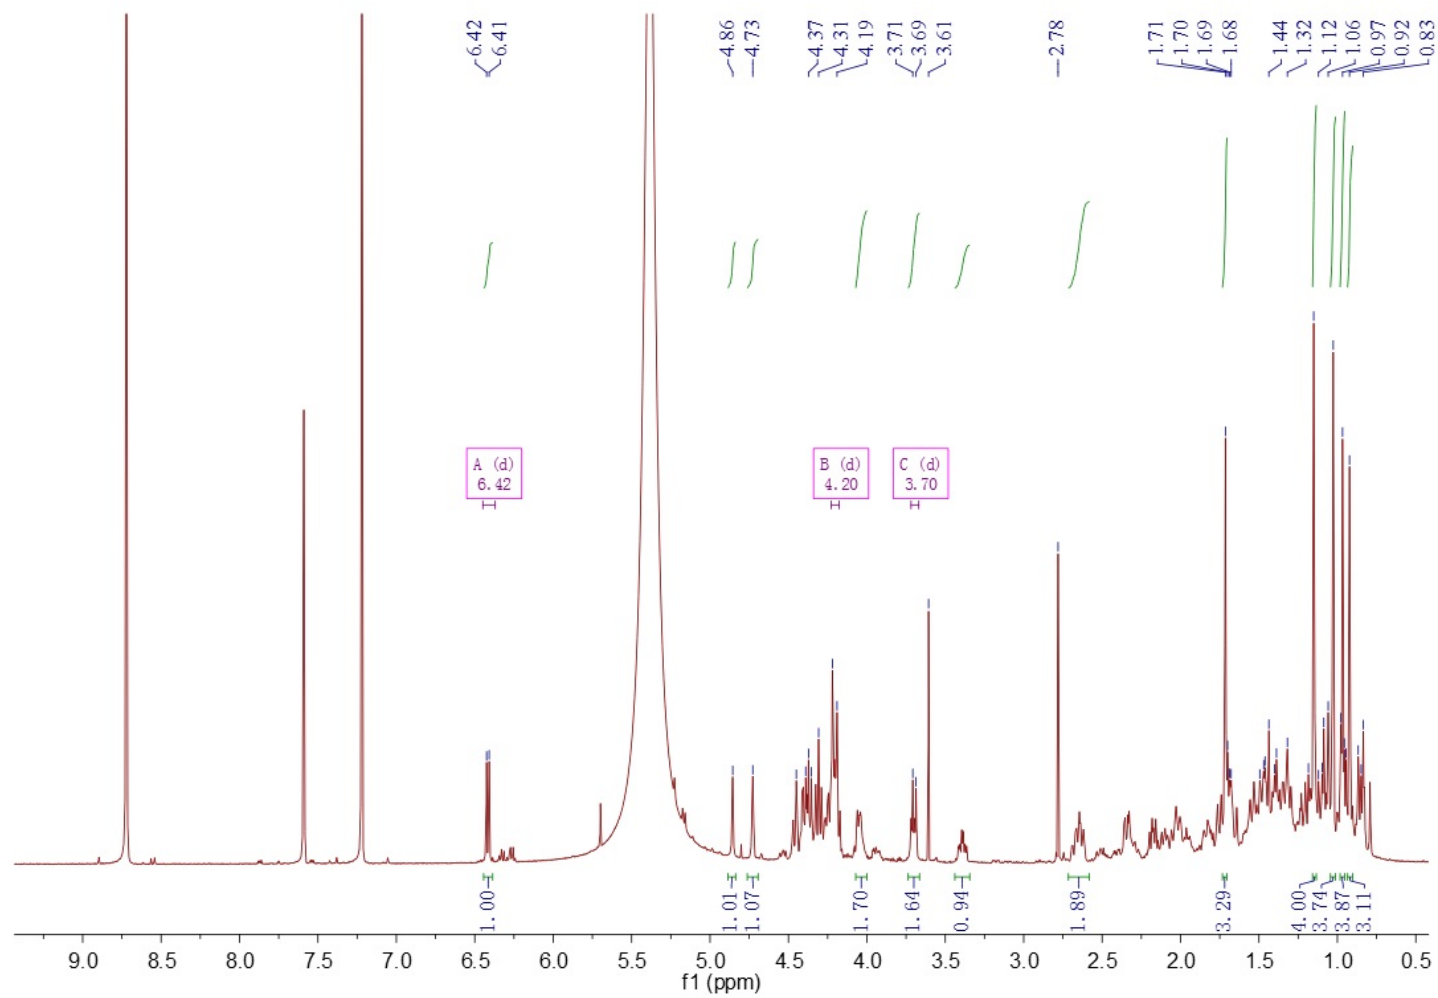



$^{13}\text{C}$  NMR spectrum of compound **2**

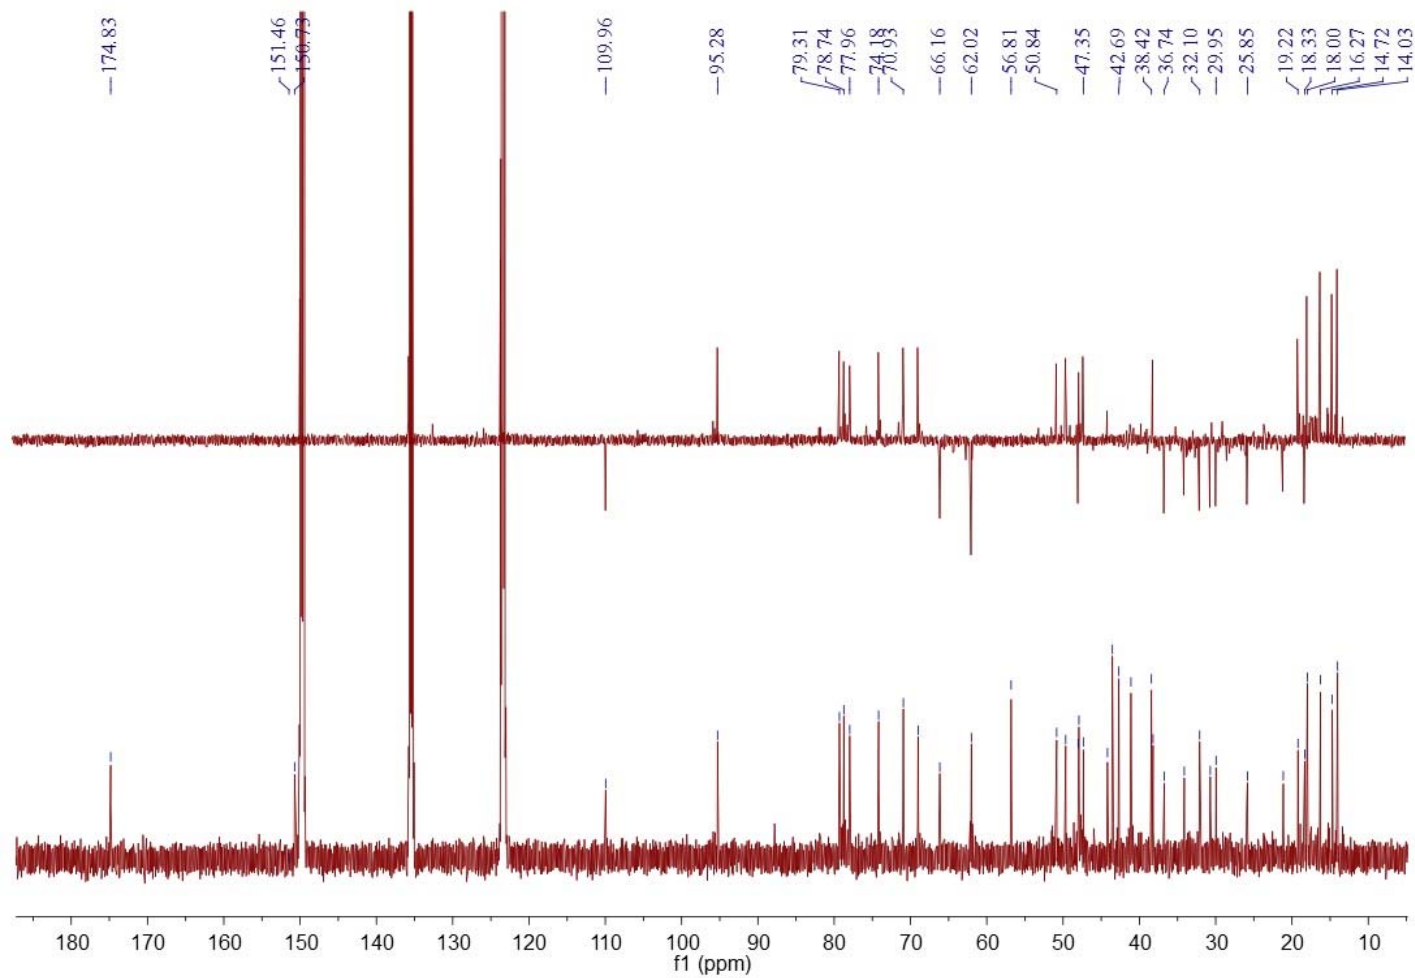

HSQC spectrum of compound 2

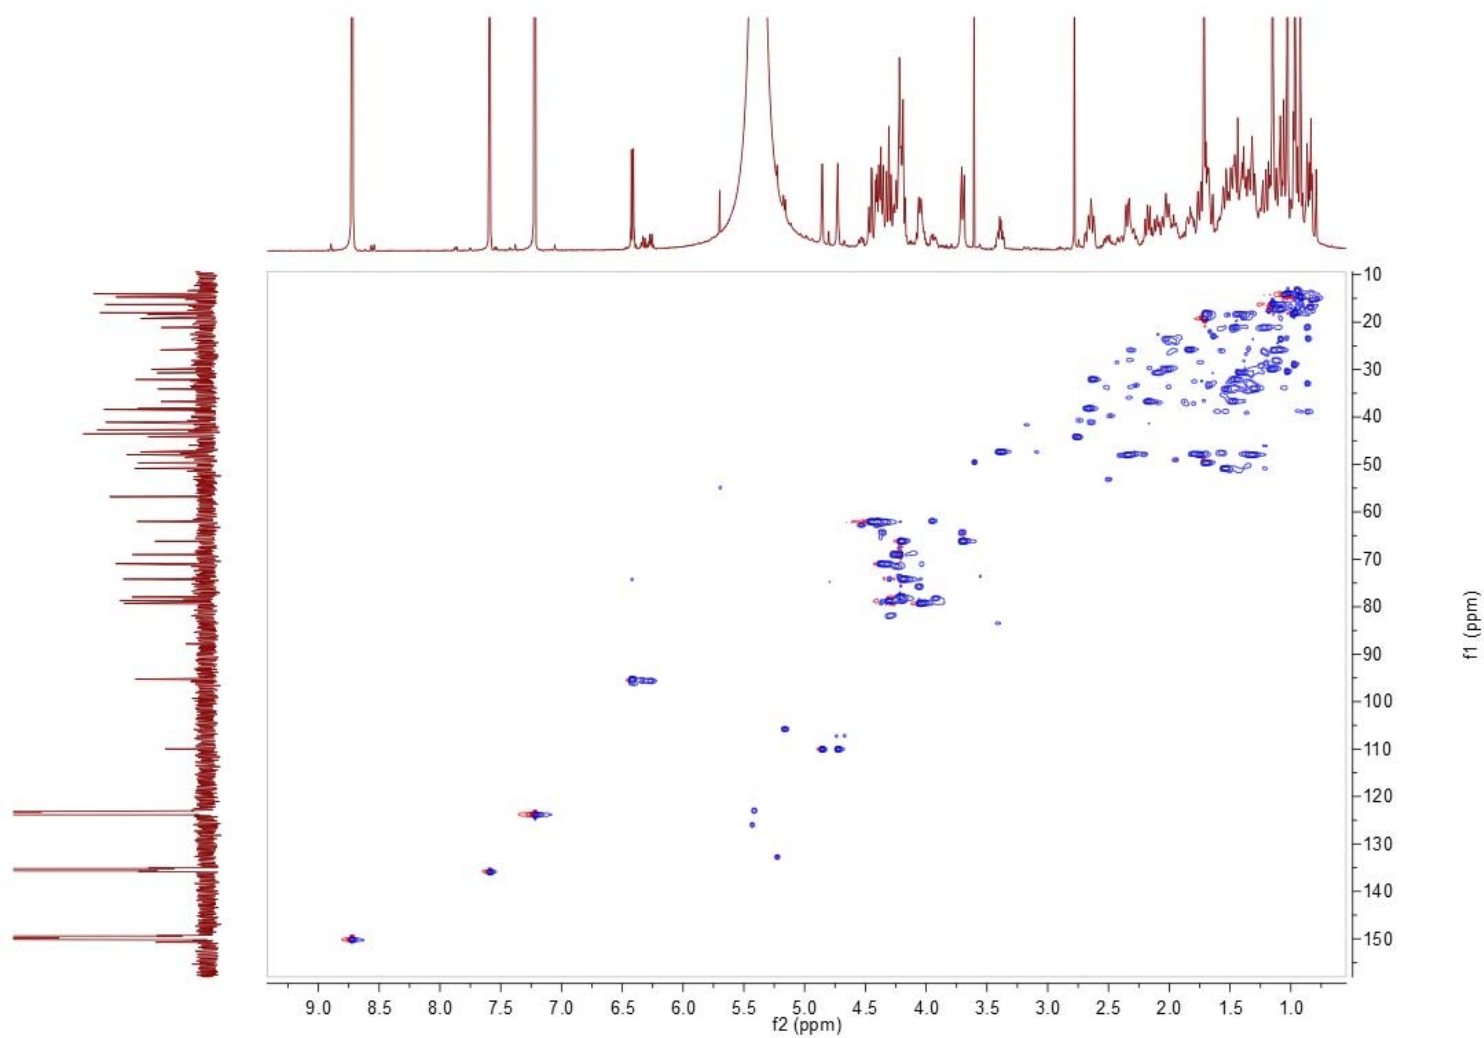

HMBC spectrum of compound **2**

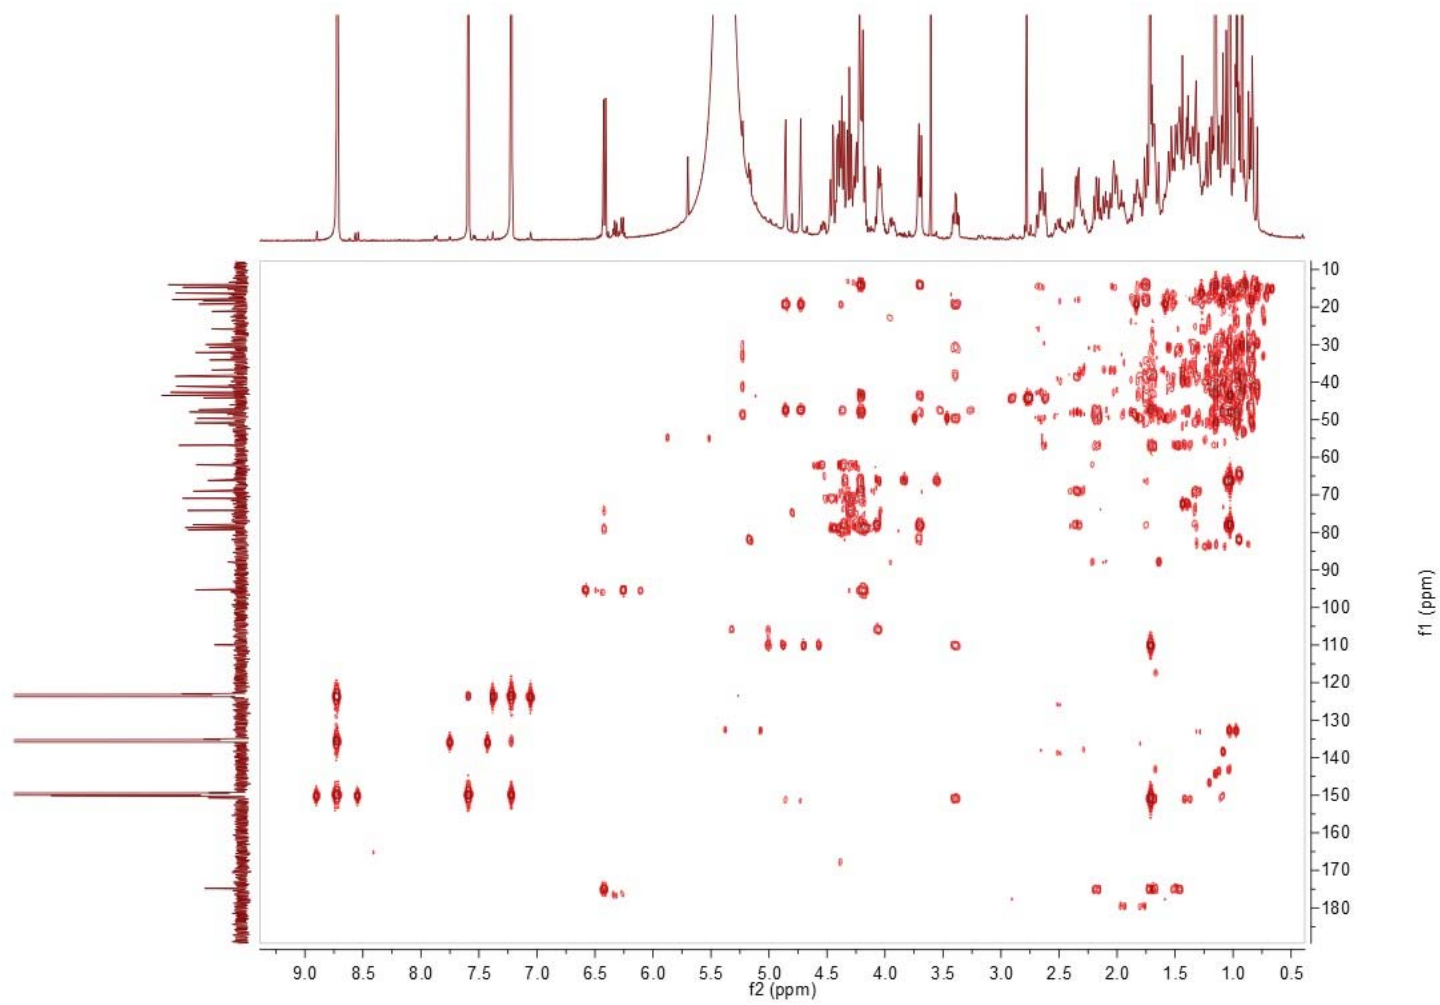

NOESY spectrum of compound 2

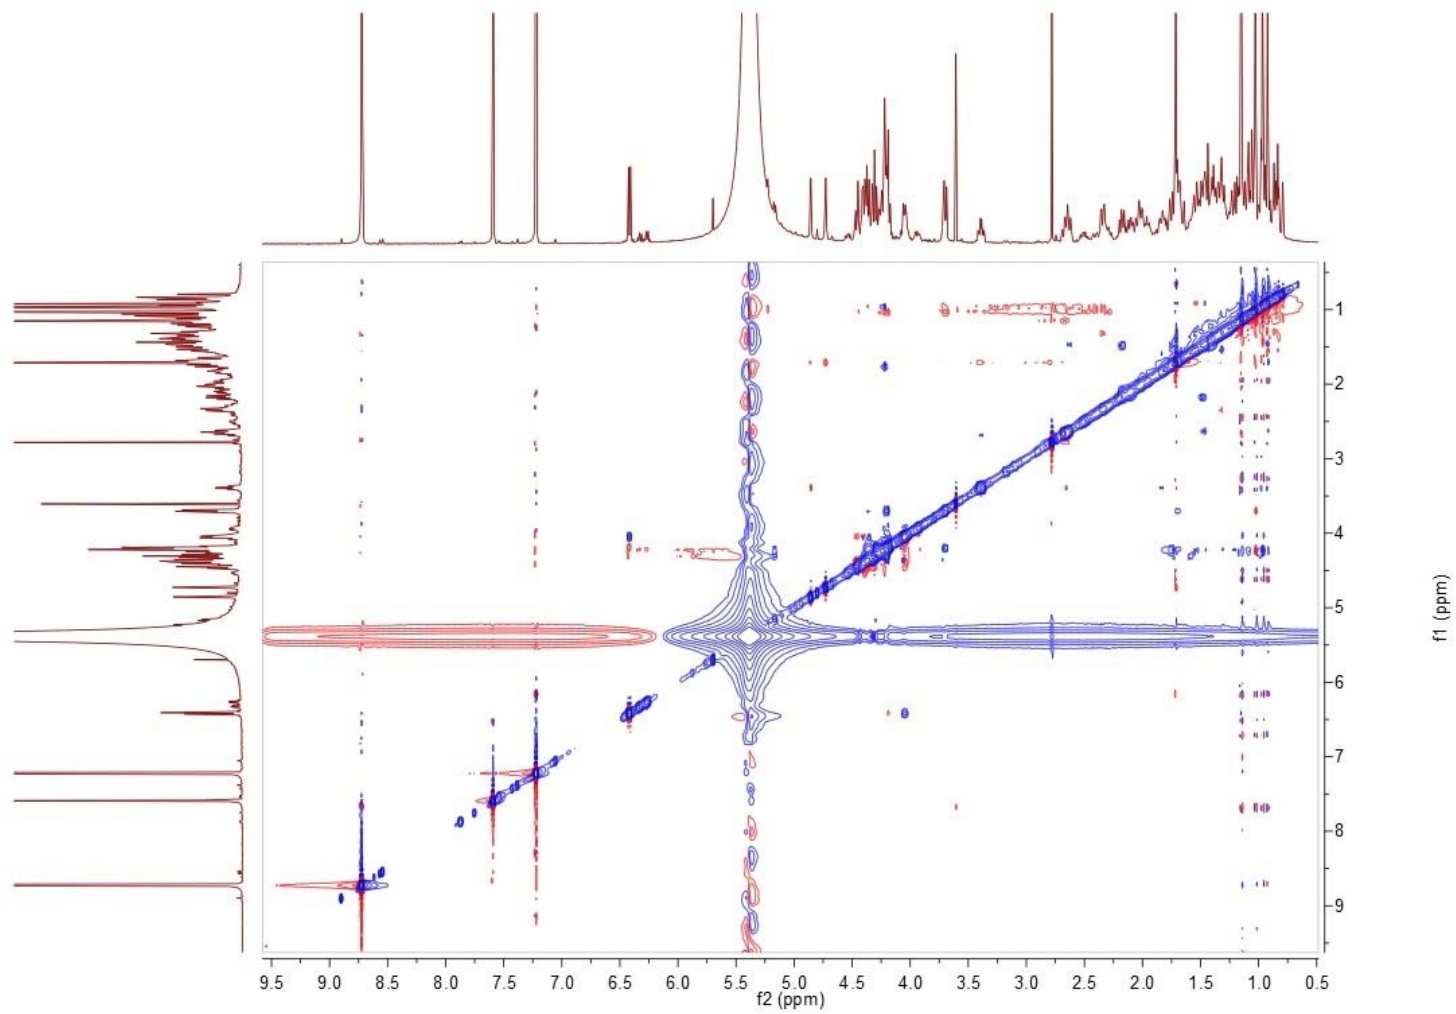

Supplement: c8ra08894b1.pdf [file c8ra08894b1.pdf]
